# Supplementary material
Source: PubMed Central journal article supplement (PMC7080378)
Supplement: HESR-55-170-s002.pdf [file HESR-55-170-s002.pdf]

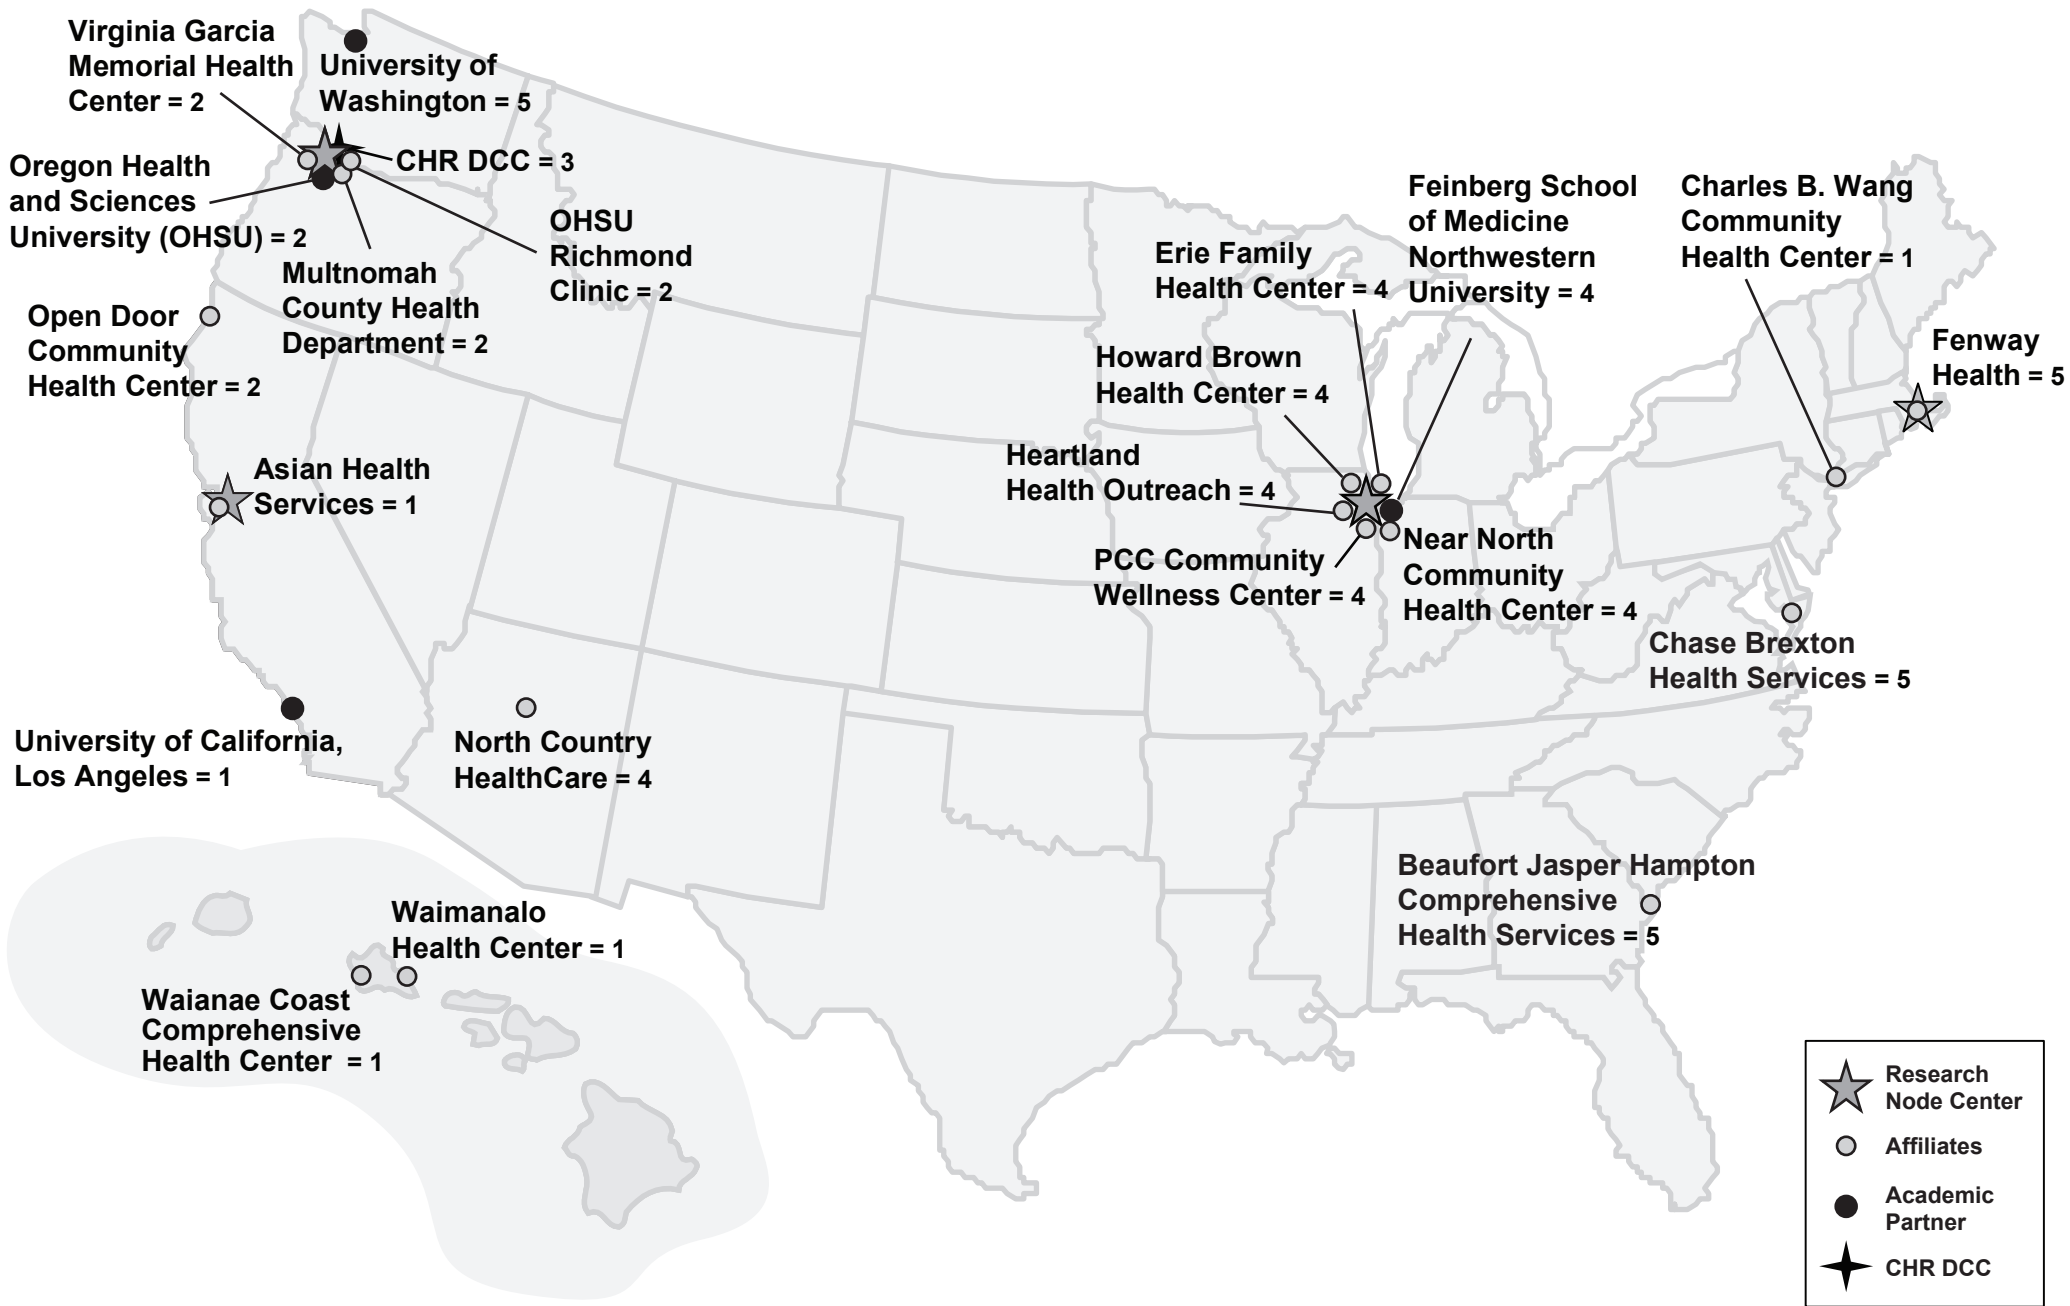

1. Association of Asian Pacific Community Health Organizations Node

2. OCHIN Node

3. Center For Health Research Data Coordinating Center (CHR DCC)

4. Alliance of Chicago Community Health Services Node

5. Fenway Health Node
