# Supplementary material
Source: PubMed Central journal article supplement (PMC7080378)
Supplement: HESR-55-170-s003.pdf [file HESR-55-170-s003.pdf]

## 2013 CHARN CHC Characteristics as Reported Via UDS

|                                  | ARIZONA                          | CALIFORNIA                  |                                               | HAWAII                        |                                                  | ILLINOIS                         |                                 |                                           |                                                 |                                     | MARYLAND                                      | MASS.                                   | NY                                            | OREGON                                       |                                 |                                                          | SOUTH CAROLINA                                                          | Total (C*) |
|----------------------------------|----------------------------------|-----------------------------|-----------------------------------------------|-------------------------------|--------------------------------------------------|----------------------------------|---------------------------------|-------------------------------------------|-------------------------------------------------|-------------------------------------|-----------------------------------------------|-----------------------------------------|-----------------------------------------------|----------------------------------------------|---------------------------------|----------------------------------------------------------|-------------------------------------------------------------------------|------------|
|                                  | North Country Health Care (NCHC) | Asian Health Services (AHS) | Open Door Community Health Center (Open Door) | Waimanalo Health Center (WHC) | Waianae Coast Comprehensive Health Center (WCHC) | Erie Family Health Center (Erie) | Heartland Health Outreach (HHO) | Howard Brown Health Center (Howard Brown) | Near North Community Health Center (Near North) | PCC Community Wellness Center (PCC) | Chase Brexton Health Services (Chase Brexton) | Fenway Community Health Center (Fenway) | Charles B. Wang Community Health Center (CBW) | Multnomah County Health Department (Mult Co) | OHSU Richmond Clinic (Richmond) | Virginia Garcia Memorial Health Center (Virginia Garcia) | Beaufort Jasper Hampton Comprehensive Health Services (Beaufort Jasper) | CHARN      |
| Total Patients*                  | 49,065                           | 24,456                      | 45,506                                        | 4,708                         | 32,905                                           | 52,168                           | 8,570                           | 6,712                                     | 34,595                                          | 46,236                              | 24,101                                        | 22,086                                  | 47,521                                        | 67,267                                       | 11,403                          | 36,281                                                   | 17,439                                                                  | 531,019    |
| EHR start year                   | Nov 2009 ^                       | 2004 #                      | 2008(Del Norte), 2009 (remainder) ^           | Not reported                  | WCCHC 2003 ^                                     | Jun 2006 ^                       | Oct 2006 ^                      | Aug 2006 ^                                | 1995, Ambulatory Version - EMR 2005) #          | 2010                                | 2003 ^                                        | 1997 ^                                  | 2005, 2006 ^                                  | 2005-2010 ^                                  | 2006                            | 2008-2010                                                | 2005 ^                                                                  |            |
| Rural (Y/N)?                     | Y                                | N                           | Y                                             | Y                             | Y                                                | N                                | N                               | N                                         | N                                               | N                                   | N                                             | N                                       | N                                             | N                                            | N                               | N                                                        | Y                                                                       |            |
| Budget (\$millions) (Total Cost) | \$33.8                           | \$30.2                      | \$38.1                                        | \$5.7                         | \$50.1                                           | \$39.2                           | \$9.4                           | \$18.2                                    | \$16.6                                          | \$24.2                              | \$55.5                                        | \$36.9                                  | \$36.3                                        | \$106.5                                      | \$13.2                          | \$33.3                                                   | \$19.1                                                                  | \$566.3    |
| Budget amount per Patient (C*)   | \$688.88                         | \$1,234.87                  | \$837.25                                      | \$1,210.71                    | \$1,522.56                                       | \$751.42                         | \$1,096.85                      | \$2,711.56                                | \$479.84                                        | \$523.40                            | \$2,302.81                                    | \$1,670.74                              | \$763.87                                      | \$1,583.24                                   | \$1,157.59                      | \$917.84                                                 | \$1,095.25                                                              | \$1,066.44 |
| Age 18-64 (%)                    | 65.2%                            | 56.5%                       | 63.7%                                         | 65.3%                         | 57.2%                                            | 51.4%                            | 92.4%                           | 95.9%                                     | 67.4%                                           | 56.9%                               | 80.1%                                         | 95.4%                                   | 63.5%                                         | 52.0%                                        | 72.6%                           | 52.0%                                                    | 56.7%                                                                   | 62.2%      |
| Female (% for age 15-64)         | 72.1%                            | 65.9%                       | 69.8%                                         | 73.9%                         | 66.9%                                            | 67.2%                            | 91.1%                           | 96.1%                                     | 75.0%                                           | 69.3%                               | 83.4%                                         | 95.7%                                   | 74.3%                                         | 65.2%                                        | 76.7%                           | 63.7%                                                    | 65.8%                                                                   | 71.5%      |
| Racial or Ethnic Minority (%)    | 28.9%                            | 99.2%                       | 18.6%                                         | 83.3%                         | 84.9%                                            | 93.6%                            | 74.6%                           | 45.1%                                     | 94.3%                                           | 92.5%                               | 69.9%                                         | 27.4%                                   | 98.5%                                         | 60.5%                                        | 23.8%                           | 73.4%                                                    | 70.6%                                                                   | 68.6%      |
| Hispanic (%)                     | 15.1%                            | 0.8%                        | 11.3%                                         | 8.2%                          | 8.4%                                             | 77.6%                            | 11.3%                           | 18.1%                                     | 21.9%                                           | 34.6%                               | 12.8%                                         | 9.5%                                    | 1.9%                                          | 34.5%                                        | 8.1%                            | 69.2%                                                    | 14.7%                                                                   | 26.4%      |
| Below FPL* (%)                   | 64.1%                            | 70.9%                       | 58.7%                                         | 68.7%                         | 75.0%                                            | 84.4%                            | 92.2%                           | 64.8%                                     | 77.2%                                           | 75.6%                               | 76.0%                                         | 44.5%                                   | 69.7%                                         | 82.8%                                        | 61.7%                           | 80.4%                                                    | 79.4%                                                                   | 73.1%      |
| Hypertension (%)                 | 17.8%                            | 27.7%                       | 20.6%                                         | 25.8%                         | 19.3%                                            | 10.0%                            | 20.8%                           | 8.9%                                      | 17.8%                                           | 12.8%                               | 21.4%                                         | 8.7%                                    | 14.5%                                         | 29.3%                                        | 21.4%                           | 19.9%                                                    | 44.9%                                                                   | 19.5%      |
| Diabetes (%)                     | 10.0%                            | 14.8%                       | 9.1%                                          | 14.6%                         | 13.3%                                            | 11.5%                            | 9.2%                            | 3.7%                                      | 8.8%                                            | 7.9%                                | 11.0%                                         | 3.1%                                    | 6.2%                                          | 14.0%                                        | 9.7%                            | 14.8%                                                    | 25.8%                                                                   | 10.9%      |
| Tobacco use screening (%)        | 86.9%                            | 98.6%                       | 99.2%                                         | 98.6%                         | 86.6%                                            | 99.0%                            | 100.0%                          | 99.4%                                     | 96.4%                                           | 100.0%                              | 87.1%                                         | 85.2%                                   | 90.9%                                         | 78.4%                                        | 98.3%                           | 98.5%                                                    | 92.1%                                                                   | 92.3%      |
| Tobacco cessation counseling (%) | 54.7%                            | 95.7%                       | 35.1%                                         | 70.0%                         | 69.9%                                            | 60.8%                            | 87.1%                           | 73.7%                                     | 100.0%                                          | 81.4%                               | 73.6%                                         | 63.4%                                   | 91.9%                                         | 15.2%                                        | 52.7%                           | 89.0%                                                    | 75.9%                                                                   | 65.2%      |

^ Ambulatory Vendor implementation date

# Patient registration vendor implementation year (Ambulatory = blank)

(C\*) Computed outside UDS
